# Supplementary material
Source: MDPI journal article supplement (https://www.mdpi.com/2073-4344/6/6/86)
Supplement: s1 [file s1]

# Supplementary Materials: Oxygen Reduction Electrocatalysts Based on Coupled Iron Nitride Nanoparticles with Nitrogen-Doped Carbon

Min Jung Park, Jin Hee Lee, K. P. S. S. Hembram, Kwang-Ryeol Lee, Sang Soo Han, Chang Won Yoon, Suk-Woo Nam and Jin Young Kim

## 1. DFT calculations of XRD spectra

The stability of the structures are calculated by formation energy, defined as  $E_f(x) = E_{tot}(\text{Fe}_x\text{N}_y) - E_{tot}(\text{Fe}) - x E_{tot}(\text{N})$ , where  $E_{tot}(\text{Fe}_x\text{N}_y)$  is the total energy per  $\text{Fe}_x\text{N}_y$  unit,  $E_{tot}(\text{Fe})$  is the total energy per iron atom in the Fe crystal and  $E_{tot}(\text{N})$  is the energy per nitrogen atom in the  $\text{N}_2$  molecule. Density functional theory (DFT) calculations were carried out with the Vienna ab-initio simulation package (VASP) [1,2] The exchange-correlation energy is described by generalized gradient approximation (GGA) proposed by Perdew, Burke and Ernzerhof (PBE) [3] The electronic wave functions were expanded on a plane wave basis set with a kinetic energy cutoff at 500 eV. Effects of the core electrons were replaced by projector augmented wave (PAW) potentials [4] After having obtained the most optimized structure from DFT calculation, a theoretical XRD pattern was generated by FullProf suite to match the experimental data.

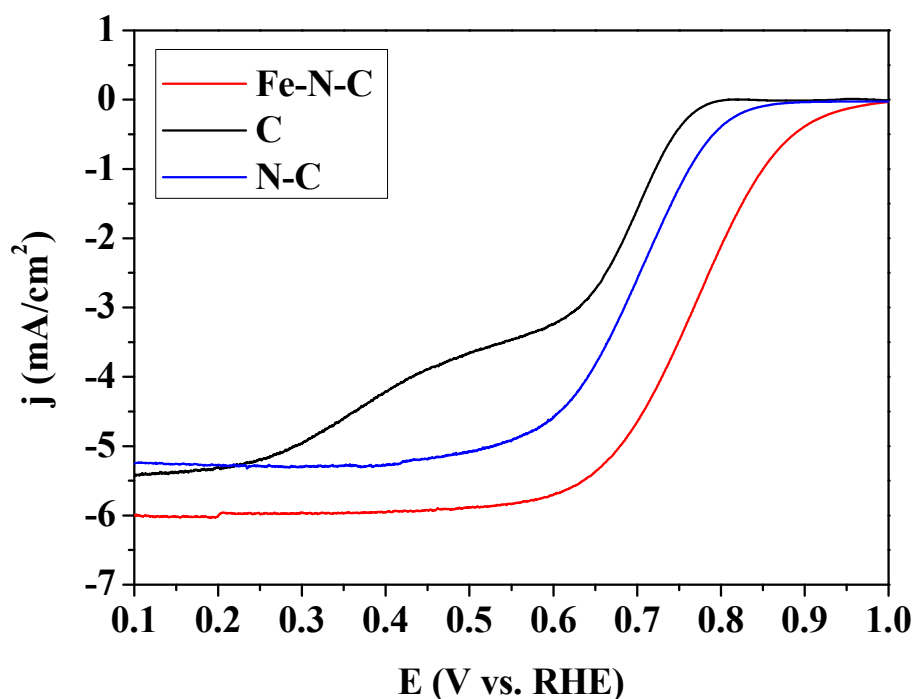

Figure S1. Linear sweep voltammetry curves of ORR in 0.1 M KOH catalyzed by Fe-N-C, C, and N-C.

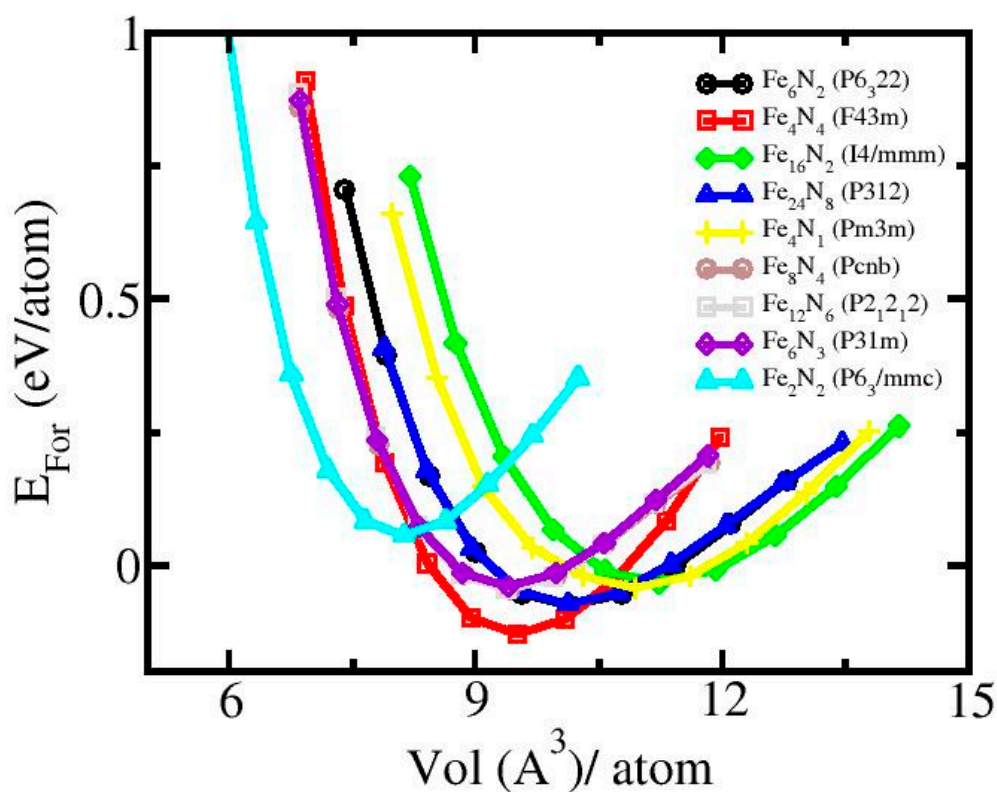

Figure S2. Calculated formation energy for different  $\text{Fe}_x\text{N}_y$  compounds.

## References

1. Kresse, G.; Furthmüller, J. Efficient iterative schemes for total-energy calculations using a plane-wave basis set. *Phys. Rev. B* **1996**, *54*, 11169–11186.
2. Kresse, G.; Furthmüller, J. Efficiency of ab-initio total energy calculations for metals and semiconductors using a plane-wave basis set. *Comput. Mater. Sci.* **1996**, *6*, 15–50.
3. Perdew, J.P.; Burke, K.; Ernzerhof, M. Generalized gradient approximation made simple. *Phys. Rev. Lett.* **1996**, *77*, 3865–3868.
4. Blöchl, P.E. Projector augmented-wave method. *Phys. Rev. B* **1994**, *50*, 17953–17979.
